# Supplementary material
Source: publisher figshare collection journal article supplement (https://karger.figshare.com/ndownloader/files/13826513)
Supplement: Supplementary file 1 [file 13826513]

| Number | Histopathological diagnosis cTBB | Histopathological diagnosis SLB | Final diagnosis |
| --- | --- | --- | --- |
| 1 | Unspecific, Fibrosis, no granuloma | UIP pattern | IPF |
| 2 | Unspecific, Chronic interstitial inflammation with hyperplasia | UIP pattern | IPF |
| 3 | Unspecific, Neutrophil and eosinophilic granulocytes, bronchitis, no inflammatory infiltrate | No fibroblast foci, inflammatory changes consistent with HP | HP |
| 4 | No detection of lung parenchyma | Interstitial lymphoide inflammatory, plasma cells, histiocytes, lymph follicles, granuloma, cholesterol clefts, giant cells | HP |
| 5 | Unspecific, No fibroblast foci | Inflammatory changes consistent with HP | HP |
| 6 | Unspecific, Fibrosis, no granuloma | Fibrosis, circular cell infiltrates, no eosinophilia, | Sarcoidosis |
| 7 | Unspecifi | Interstitial inflammatory, lymphoid follicles, no epitheloid cell granuloma, IgG4 positive plasma cells | IgG4 associated ILD |
| 8 | No fibroblast foci, circular cell infiltrates | Interstitial fibrosis, granulation issue, fibrosis NSIP pattern | Idiopathic NSIP |

Table 1 comparison of the histological result of the transbronchial cryobiopsy with the result of the surgical biopsy in the patient group, which had an additional surgical biopsy.
